# Supplementary material
Source: Springer Nature journal article supplement (https://www.springermedizin.de/resource/supplementary/12974_2005_43_MOESM5_ESM.pdf/9600656)

**A.**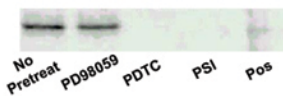**B.**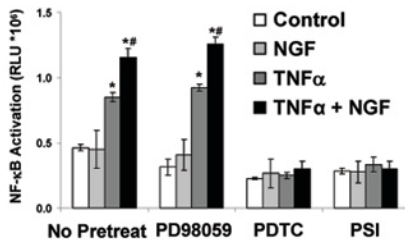**C.**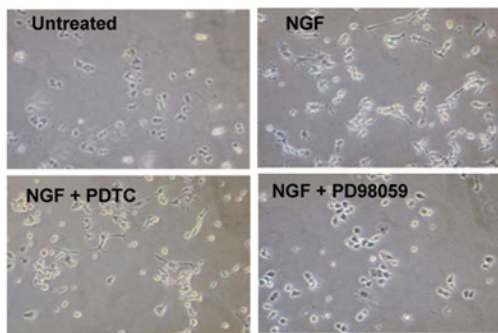**D.**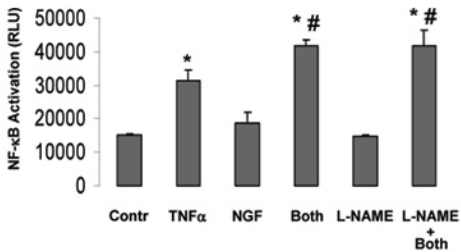

Supplement: MOESM5 [file 9600656]
